# Supplementary material for: Extracellular signal-regulated kinase phosphorylation enhancement and NaV1.7 sodium channel upregulation in rat dorsal root ganglia neurons contribute to resiniferatoxin-induced neuropathic pain: The efficacy and mechanism of pulsed radiofrequency therapy
Source: PubMed Central journal article supplement — Mol Pain. 2022 Apr 13;18:17448069221089784. doi: 10.1177/17448069221089784 (PMC9019323; doi:10.1177/17448069221089784), 2022-04-13
Supplement: sj-pdf-1-mpx-10.1177_17448069221089784.pdf [file sj-pdf-1-mpx-10.1177_17448069221089784.pdf]

Continued

**Fig. 5C**

**pERK  
Western Blot**

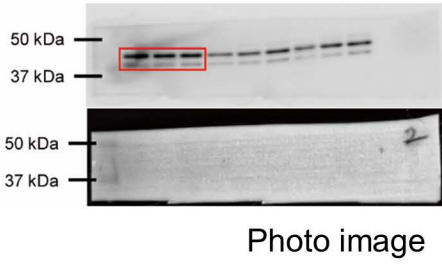

**ERK  
Western Blot**

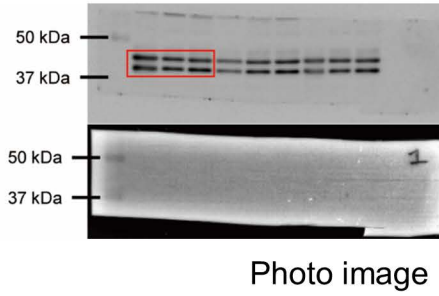

**$\beta$ -actin  
Western Blot**

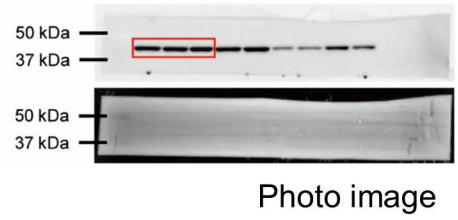

**Fig. 8A**

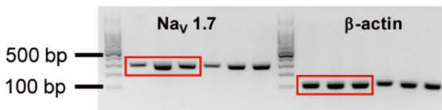

**Fig. 8C**

**$\text{Na}_v 1.7$   
Western Blot**

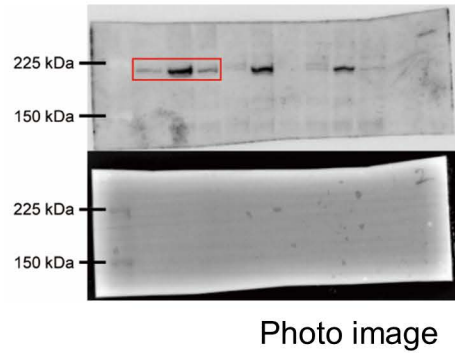

**$\beta$ -actin  
Western Blot**

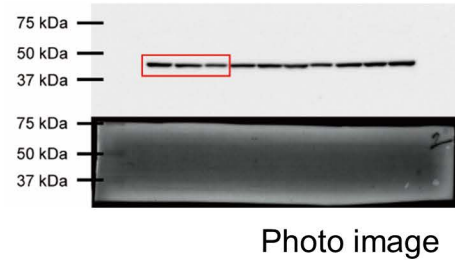

**Supplementary Fig. 1. Expanded views of western blot and PCR findings including weight marker in Figs 1, 4, 5, and 8.** The red boxes highlight the areas used in the figures. Note that in Fig. 5A, as we did not save the photograph of membrane of these series, we provide the contrast-adjusted gel images, in which the marker bands appeared.

**Fig. 1**

**Na<sub>v</sub> 1.7  
Western Blot**

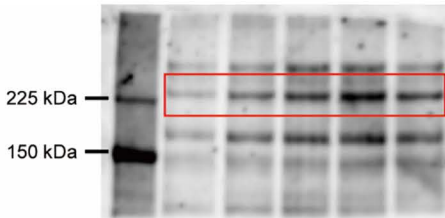

**β-actin  
Western Blot**

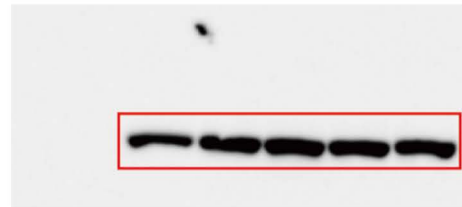

**Fig. 4A**

**Na<sub>v</sub> 1.7  
PCR**

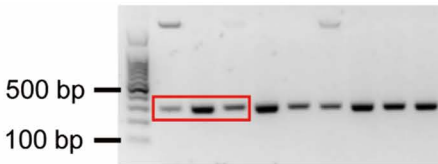

**β-actin  
PCR**

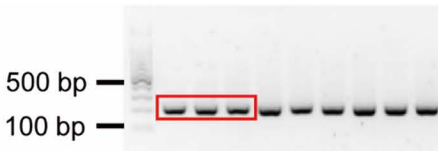

**Fig. 4C**

**Na<sub>v</sub> 1.7  
Western Blot**

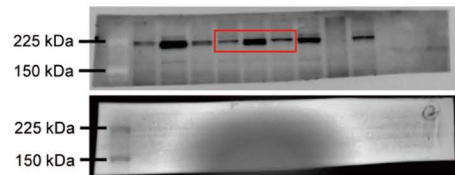

Photo image

**β-actin  
Western Blot**

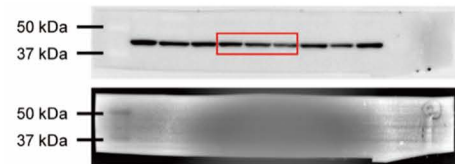

Photo image

**Fig. 5A**

**pERK  
Western Blot**

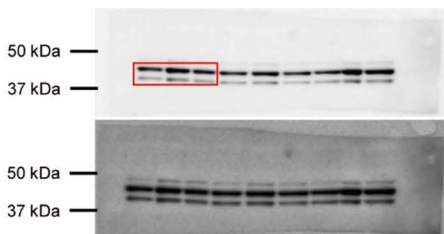

**ERK  
Western Blot**

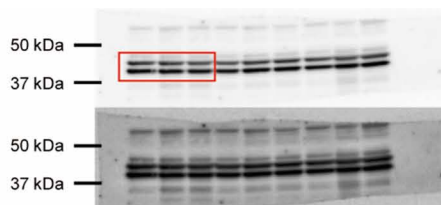

**β-actin  
Western Blot**

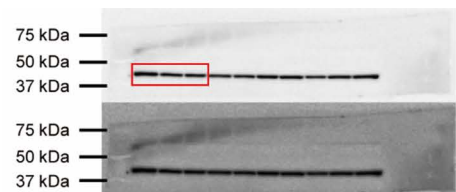

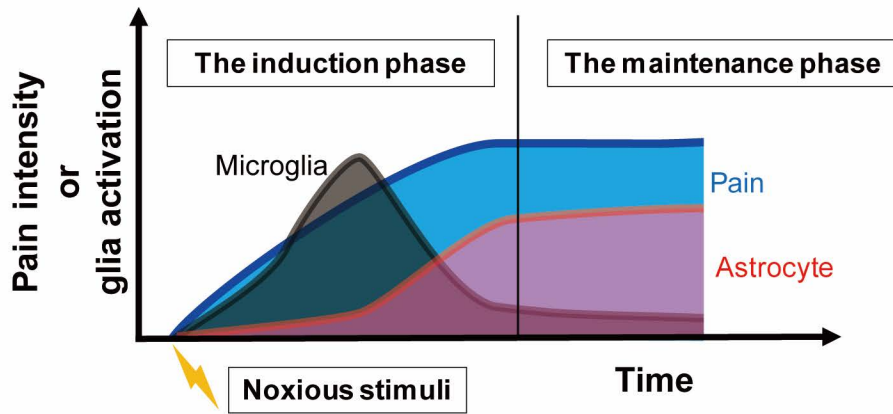

**Supplementary Fig. 2. Schematic representation of the phase change that occurs during neuropathic pain evolution.** Noxious stimuli, such as RTX exposure, trigger microglial and astrocyte activation. Microglial activation gradually declines; however, astrocyte activation continues in the presence of noxious stimuli. Hence, microglia and astrocytes contribute to the induction and maintenance phases of neuropathic pain evolution, respectively.
